# Supplementary material for: Efficacy of a Novel Class of RNA Interference Therapeutic Agents
Source: PLOS journal article supplement (doi:10.1371/journal.pone.0042655), 2012-08-15

**A**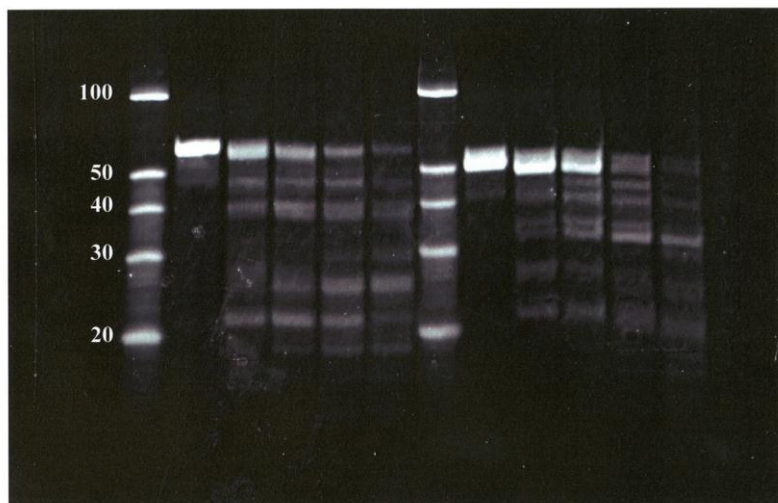

| Time (h) | - | 0            | 1 | 3 | 6 | 18 | - | 0             | 1 | 3 | 6 | 18 |
|----------|---|--------------|---|---|---|----|---|---------------|---|---|---|----|
| M (bp)   |   | TGF-β1 nkRNA |   |   |   |    |   | TGF-β1 PnkRNA |   |   |   |    |

**B****MALDI-TOF-Mass Spectrum of TGF-β1 nkRNA 1h after digestion by Dicer**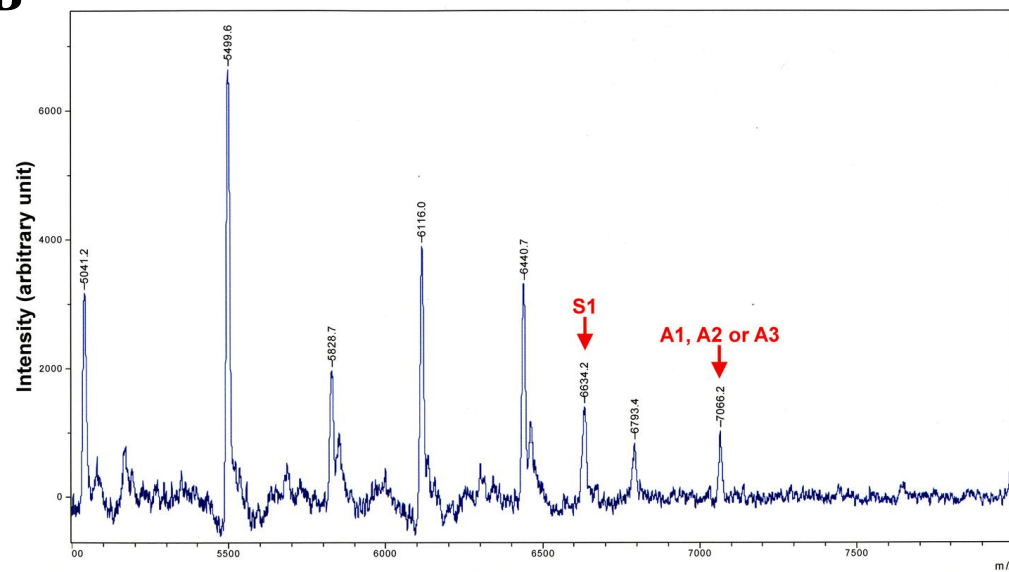**C****MALDI-TOF-Mass Spectrum of TGF-β1 PnkRNA 1h after digestion by Dicer**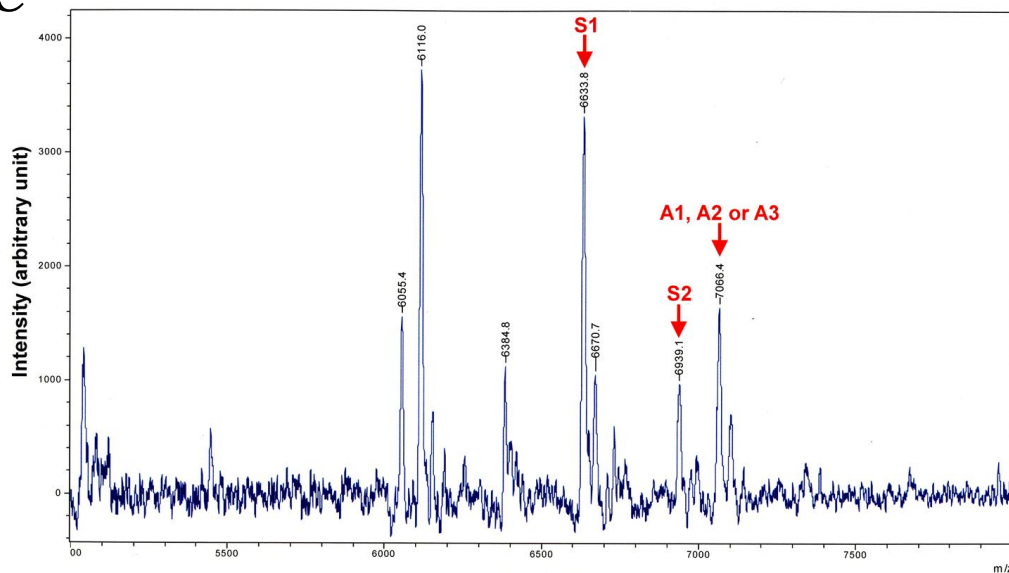

Supplement: S3 (10.1371/journal.pone.0042655.s003) [file journal.pone.0042655.s003]
